1 **Aerobiosis is not associated with GC content and G to T**  
2 **mutations are not the signature of oxidative stress in prokaryotic**  
3 **evolution**

4

5 Sidra Aslam†, Xin-Ran Lan†, Bo-Wen Zhang, Zheng-Lin Chen and Deng-Ke Niu\*

6 MOE Key Laboratory for Biodiversity Science and Ecological Engineering and Beijing Key

7 Laboratory of Gene Resource and Molecular Development, College of Life Sciences, Beijing

8 Normal University, Beijing 100875, China

9 †Contributed equally.

10

11 \*Author for Correspondence: Deng-Ke Niu, College of Life Sciences, Beijing Normal

12 University, Beijing 100875, China. Telephone number: +86-10-58802064; Email addresses:

13 [dkniu@bnu.edu.cn](mailto:dkniu@bnu.edu.cn), [dengkeniu@hotmail.com](mailto:dengkeniu@hotmail.com)

14

15 Sidra Aslam: [sidra.aslam29@yahoo.com](mailto:sidra.aslam29@yahoo.com)

16 Xin-Ran Lan: [lanxinran@hotmail.com](mailto:lanxinran@hotmail.com)

17 Bo-Wen Zhang: [zhangbw@mail.bnu.edu.cn](mailto:zhangbw@mail.bnu.edu.cn)

18 Zheng-Lin Chen: [13391702689@163.com](mailto:13391702689@163.com)

19

20

21

22

## 23 **Abstract**

24 **Background:** Among the four bases, guanine is the most susceptible to damage from  
25 oxidative stress. Replication of DNA containing damaged guanines result in G to T mutations.  
26 Therefore, the mutations resulting from oxidative DNA damage are generally expected to  
27 predominantly consist of G to T (and C to A when the damaged guanine is not in the  
28 reference strand) and result in decreased GC content. However, the opposite pattern was  
29 reported 16 years ago in a study of prokaryotic genomes. Although that result has been widely  
30 cited and confirmed by nine later studies with similar methods, the omission of the effect of  
31 shared ancestry requires a re-examination of the reliability of the results.

32 **Results:** We retrieved 70 aerobe-anaerobe pairs of prokaryotes, and members of each pair  
33 were adjacent on the phylogenetic tree. Pairwise comparisons of either whole-genome GC  
34 content or the GC content at 4-fold degenerate sites of orthologous genes among these 70  
35 pairs did not show significant differences between aerobes and anaerobes. The signature of  
36 guanine oxidation on GC content evolution has not been detected even after extensive  
37 controlling of other influencing factors. Furthermore, the anaerobes were not different from  
38 the aerobes in the rate of either G to T, C to A, or other directions of substitutions. The  
39 presence of the enzymes responsible for guanine oxidation in anaerobic prokaryotes provided  
40 additional evidence that guanine oxidation might be prevalent in anaerobic prokaryotes. In  
41 either aerobes or anaerobes, the rates of G:C to T:A mutations were not significantly higher  
42 than the reverse mutations.

43 **Conclusions:** The previous counterintuitive results on the relationship between oxygen  
44 requirement and GC content should be attributed to the methodological artefact resulting from  
45 phylogenetically non-independence among the analysed samples. Our results showed that  
46 aerobiosis does not increase or decrease GC content in evolution. Furthermore, our study

47 challenged the widespread belief that abundant G:C to T:A transversions are the signature of  
48 oxidative stress in prokaryotic evolution.

49 **Keywords:** Oxygen requirement, Reactive oxygen species, Aerobe, Anaerobe,  
50 Phylogenetically independent, Nucleotide composition, Substitution rate, Guanine oxidation,  
51 Mutational spectrum.

52

## 53 **Background**

54 Oxygen is an essential environmental factor for most organisms living on Earth, and its  
55 accumulation was the most significant change in the evolution of the biosphere and  
56 dramatically influenced the evolutionary trajectory of all exposed organisms [1]. Oxidative  
57 metabolism provides a large amount of energy to aerobic organisms and produces an  
58 unavoidable by-product: reactive oxygen species (ROS). ROS are highly reactive with most  
59 cellular organic molecules, including nucleotides and their polymerized products, DNA and  
60 RNA. Among the four bases, guanine has the lowest oxidation potential and is the most  
61 susceptible to oxidation [2]. The direct products of deoxyguanosine oxidation are  
62 8-oxo-7,8-dihydro-guanosine (8-oxoG) and 2,6-diamino-4-hydroxy-5-formamidopyrimidine.  
63 As 8-oxoG has a lower oxidation potential than deoxyguanosine, 8-oxoG is susceptible to  
64 further oxidation into several hyper-oxidized products [3]. The replication of DNA containing  
65 these damaged deoxyguanosines can cause G to T mutations, the frequency of which depends  
66 on the efficiency of DNA repair enzymes and the accuracy of replication enzymes [3]. When  
67 the oxidatively damaged guanines are not in the reference strand, the mutations they caused  
68 would manifest as C to A mutations in the reference strand. Therefore, in some literatures the  
69 mutations resulting from oxidatively damaged guanines were denoted by G to T transversions  
70 while in other literatures they were denoted by G:C to T:A transversions. No matter which  
71 means of presentation, the G:C to T:A transversions were generally considered the hallmark

72 of oxidative damage to DNA [4-7]. Consequently, oxidative DNA damage was generally  
73 believed to be a mutational force to decrease GC content [8-10]. Consistent with this idea, a  
74 negative association had been observed between metabolic rate and the GC content at the  
75 silent sites of animal mitochondrial genomes [11].

76 However, 16 years ago, Naya et al. [10] observed an entirely opposite pattern in which  
77 aerobic prokaryotes had higher GC contents than anaerobic prokaryotes in a comparison of  
78 whole-genome GC content using nonphylogenetically controlled statistics. Furthermore, these  
79 authors showed that the pattern was still evident when aerobes and anaerobes were compared  
80 within each major phylum of archaea and bacteria. Opposing to the widespread belief that  
81 oxidative stress causes frequent G:C to T:A transversions and decreases GC content, these  
82 results were described as “*counterintuitive*” [8]. The authors abandoned the neutralist  
83 interpretation to investigate possible selective forces, and they found that aerobes have lower  
84 frequencies of amino acids that are more susceptible to oxidation. As the non-synonymous  
85 sites of these amino acids are AT-rich, the high GC content of the aerobes might be explained  
86 by a deficiency of these amino acids. Moreover, they identified two potential benefits for  
87 aerobes with higher GC content. First, a high GC content might provide more stability to the  
88 DNA double strand, which would then be less accessible to oxygen radicals. Second,  
89 guanines located at synonymous sites might play a sacrificial role to protect other bases. This  
90 intriguing idea has been presented repeatedly [12, 13]. However, sacrificial guanine bases are  
91 easily mutated to T, and a mechanism is not available to maintain the sacrificial guanine bases  
92 during evolution [9]. Seven years later, the same group found that the GC content of  
93 microbial communities living in the dissolved oxygen minimum layer (770 m) is lower than  
94 that of communities living in other (either below or above) layers of the seawater column in  
95 the North Pacific Subtropical Gyre, thus emphasizing the link between aerobiosis and  
96 genomic GC content [14]. In contrast, three later studies on seawater columns ranging from

97 tens to thousands of metres observed that the GC content of metagenomes tends to increase  
98 linearly with depth in marine habitats, with the lowest GC content observed in near-surface  
99 stratified waters [15-17]. Regardless of the data obtained for microbial communities  
100 inhabiting different seawater depths, the pattern of higher GC content in aerobes has been  
101 repeatedly observed in various nonphylogenetically controlled comparisons. Later studies by  
102 nine independent groups, each with their own criteria for selecting species, observed the same  
103 pattern [18-26].

104 A possible explanation of the counterintuitive observations is provided by artefacts  
105 resulting from the phylogenetic non-independence of the data [27]. In 2008 and 2010, two  
106 groups independently compared the whole-genome GC content of aerobes and anaerobes and  
107 accounted for the phylogenetic relationships [21, 28]; however, they did not find a significant  
108 association between aerobiosis and GC content in the prokaryotic species they studied. These  
109 findings have received very little attention, which was likely because the two publications did  
110 not focus on the insignificant relationship between aerobiosis and GC content. Since 2009, the  
111 study by Naya et al. [10] has been cited 86 times (Google Scholar; access date: May 15, 2018);  
112 however, only one of the cited studies explicitly noted the conflicting results: “*oxygen*  
113 *requirement [10] may (or may not [21]) have an impact on GC content*” [29]. The present  
114 study calls attention to these contradictory results. We took advantage of the rapid  
115 accumulation of sequenced genomes and performed an extensive investigation on the GC  
116 content and mutational spectrum in aerobic and anaerobic prokaryotes using a  
117 phylogenetically controlled method.

118

## 119 **Results and discussion**

120 We first compared the genomic GC contents of the 1,040 aerobic samples and the 1,015  
121 anaerobic samples without considering their positions in the phylogenetic tree. The genomic

122 GC contents of the aerobic samples and the anaerobic samples are  $56.46\% \pm 12.52\%$  and  
123  $45.83\% \pm 11.03\%$ , respectively. Two-tailed Mann-Whitney  $U$  test showed that the difference  
124 between them is highly significant ( $P = 5.6 \times 10^{-77}$ ). Limiting this comparison within bacteria  
125 or archaea gave similar results ( $P = 5.6 \times 10^{-62}$  and  $1.8 \times 10^{-21}$ , respectively). Despite the  
126 much larger dataset, we also observed significantly higher GC content in aerobes than  
127 anaerobes. The reproducibility of this result is so high that the same pattern had been  
128 consistently observed in ten independent studies with nonphylogenetically controlled methods  
129 [10, 18-26].

130 To control the effects of a common ancestor, we performed a pairwise comparison  
131 between aerobes and anaerobes that are adjacent in the phylogenetic tree (Fig. 1). The  
132 difference in GC content within one pair is phylogenetically independent of the differences  
133 within any other pairs. Pairwise comparisons of the GC content between the selected  
134 aerobe-anaerobe pairs can thus be considered phylogenetically controlled comparisons. In this  
135 way, we did not find significant differences in the genomic GC content between aerobic  
136 prokaryotes and anaerobic prokaryotes (Fig. 2A, two-tailed Wilcoxon signed ranks test,  $P =$   
137  $0.826$ ). When the pairwise comparison is limited to the 65 pairs of bacteria, the difference  
138 between aerobes and anaerobes remains statistically insignificant (two-tailed Wilcoxon  
139 signed-rank test,  $P = 0.883$ ). Our phylogenetically independent comparison of genomic GC  
140 content gave a result that is different from the nonphylogenetically controlled comparisons  
141 [10, 18-26], but consistent with two previous studies that have accounted for the phylogenetic  
142 relationship [21, 28]. Still, we have not detected the signature of guanine oxidation.

143 Selective forces acting on non-synonymous sites might mask the specific effects of  
144 guanine oxidation within whole-genome sequences. For example, if codon GGG is mutated to  
145 TGG, this G to T mutation would be selected against because of the resulted change in the  
146 coded amino acid, from glycine to tryptophan. This exemplified mutation, even if occurs

147 frequently, could not be fixed in evolution and so would not contribute to the evolution of GC  
148 content. In addition, the avoidance of oxidation-susceptible amino acids, of which the  
149 non-synonymous sites are AT-rich, might selectively increase the genomic GC content in  
150 aerobic prokaryotes [4]. The consequences of guanine oxidation, as a mutational bias, would  
151 be more accurately revealed by analysing the GC content of selectively neutral sequences or  
152 sequences under weak selection. Although the 4-fold degenerate sites (4FDS) might be under  
153 selection to maintain specific patterns of codon usage bias [52], they are by far the most  
154 common candidates for neutral or weakly selected sequences. Therefore, we performed  
155 pairwise comparison of the GC content at 4FDS. However, we did not find significant  
156 difference between aerobic prokaryotes and anaerobic prokaryotes (Fig. 2B, two-tailed  
157 Wilcoxon signed ranks test,  $P = 0.951$ ).

158       Because horizontal gene transfer is extensive in prokaryotic evolution [60], the  
159 mutational force acting on the evolution of GC content in a lineage might be masked by the  
160 frequent horizontal transfer of DNA sequences with different GC content levels. The ideal  
161 genomic regions for comparison are sequences with orthologous relationships. For this reason,  
162 we compared the GC content of 4FDS within orthologous protein-coding genes. But still, we  
163 did not find significant difference between aerobic prokaryotes and anaerobic prokaryotes  
164 (Fig. 2C, two-tailed Wilcoxon signed ranks test,  $P = 0.886$ ).

165       In addition to potential selective forces acting on non-synonymous sites and horizontal  
166 gene transfer, many other factors might increase the GC content of aerobes or decrease the  
167 GC content of anaerobes by specific mechanisms unrelated to changes in the oxygen  
168 requirement [8, 30]. GC-biased gene conversion has been widely observed as a driver of GC  
169 content increments [30, 31]. Organisms living at high temperatures tend to have higher GC  
170 contents in their structural RNA [32] and possibly in their whole-genome sequences (with  
171 debate, see [33-37]). G:C base pairs use more nitrogen and are energetically more costly than

172 A:T base pairs; thus, AT-rich sequences may be favoured in non-nitrogen-fixing species and  
173 species living in challenging environments [8]. If guanine oxidation is a weak mutagenic  
174 force, then its effect on the evolution of GC content might be hidden by random combinations  
175 of these factors. Therefore, we propose that the relationship between oxygen requirement and  
176 GC content could be more accurately assessed if the oxygen requirement is the sole factor  
177 influencing the GC content that differs between each compared lineage. Although identifying  
178 all possible factors that influence the GC content of each species is impossible, distantly  
179 related species are more likely to differ in multiple factors that influence the GC content,  
180 whereas closely related aerobe-anaerobe pairs are more likely to differ only in the oxygen  
181 requirement, which is illustrated in Fig. 1. In addition to the oxygen requirement, species 10  
182 and species 11 are assumed to differ in the frequency of GC-biased gene conversion. The  
183 frequent GC-biased gene conversion in species 11 might lead to a much greater increase in  
184 the GC content relative to the decrease in GC content caused by guanine oxidation. If so,  
185 aerobic species 11 would have a higher GC content than anaerobic species 10. Thus, we  
186 examined whether the relationship between oxygen requirement and GC content depends on  
187 the divergence time between the paired lineages. The divergence time between a pair of  
188 lineages was represented by the identity of their 16S rRNA molecules. We found that, no  
189 matter which threshold was used to define the close relatedness, the difference in GC content  
190 between closely related aerobes and anaerobes was not significant (two-tailed Wilcoxon  
191 signed ranks test,  $P > 0.10$  for all the comparisons, Table 1 and Additional file 1: Table S1).

192 In spite of elaborately controlling of other potential influencing factors, we did not detect  
193 any evidence for the signature of guanine oxidation on GC content evolution. One possible  
194 explanation is that efficient repair systems have been evolved and so the oxidative damage of  
195 guanine is only mildly mutagenic in most aerobic organisms [3]. If so, an anaerobe recently  
196 originated from aerobes would not have an obvious difference in GC content with its aerobic



197 relatives. By contrast, an aerobe recently originated from anaerobes would need some time to  
198 evolve an efficient repair system. At this stage, frequent guanine oxidation would reduce the  
199 GC content. For this reason, we selected out eight orphan aerobes from our dataset. As the  
200 strain 1 illustrated in Fig. 1, the recent change in oxygen requirement of each orphan aerobe  
201 was supported by the existence of >3 close anaerobic relatives. We found eight orphan  
202 aerobes in our dataset. Pairwise comparison of these orphan aerobes with their anaerobic  
203 relatives did not show significant difference in either genomic GC content, GC content of  
204 4FDS of all protein-coding genes, or GC content of 4FDS within orthologous genes  
205 (two-tailed Wilcoxon signed ranks test,  $P > 0.05$  for all the three comparisons). As a control,  
206 we also compared the orphan anaerobes with their paired aerobes and did not find significant  
207 difference either (eight pairs, two-tailed Wilcoxon signed ranks test,  $P > 0.10$  for all the three  
208 comparisons). Small samples cannot be ruled out as a source of the lack of significant  
209 differences.

210 After the above analyses, we could hardly reject the null hypothesis that aerobiosis is not  
211 associated with GC content in the evolution of prokaryotes. It is necessary to question the  
212 widespread belief that oxidative stress predominantly increases the rate of G:C to T:A  
213 mutations. The mutations retained in evolution may be inconsistent with that observed in  
214 experimental analyses [38]. We recalled two possibilities that were generally neglected. The  
215 first one is that anaerobic prokaryotes might also frequently undergo guanine oxidation. The  
216 antioxidant enzymes used by aerobes, like superoxide dismutase, have been identified in  
217 many obligate anaerobes [39-41]. The anaerobes might occasionally confront oxygen, and  
218 more likely suffer from the free radicals generated in oxygen-independent redox reactions and  
219 in radiolysis of intracellular water by ionizing radiation. Three enzymes, MutT, MutM and  
220 MutY, have well documented to be responsible for the repairing of oxidative damaged  
221 guanines [42]. Our preliminary survey showed that these enzymes are prevalent in anaerobic

222 prokaryotes (Additional file 1: Table S2). Among the 70 anaerobic prokaryotes analysed in  
223 Fig. 2, genes encoding MutT, MutM and MutY have been detected in 41, 48, and 54 lineages,  
224 respectively. Meanwhile, in similar number of aerobic lineages (40, 51, and 57), the genes  
225 encoding these three enzymes have been detected. This result implicates the common  
226 occurrence of guanine oxidation in anaerobic prokaryotes. Consistently, the G to T and C to A  
227 substitution rates occurred at 4FDS in the orthologous genes of anaerobic prokaryotes were  
228 not lower than those of aerobic prokaryotes (two-tailed Wilcoxon signed ranks test,  $P > 0.60$   
229 for all comparisons). In addition, we did not detect any significant differences in the rates of  
230 the other 10 types of substitution (T to G, T to C, T to A, G to C, G to A, C to T, C to G, A to  
231 G, A to T, and A to C) or comparing only the orphan aerobes with the anaerobes they paired  
232 (Two-tailed Wilcoxon signed ranks test,  $P > 0.05$  for all comparisons). According to the  
233 prevailing theory for mutation-rate evolution, natural selection tends to reduce mutation rates  
234 to the limit that is set by the power of random genetic drift [43]. The amount of oxidative  
235 damages left in aerobic genomes and anaerobic genomes after enzymatic repairing might  
236 depend on the power of random genetic drift, rather than the amount of mutagenic factors,  
237 like oxygen.

238 The second possibility is the existence of an opposite mutational force which cancelled  
239 the G to T mutation bias in aerobic prokaryotes. Replication of DNA whose guanines have  
240 been oxidatively damaged would result in G to T mutations. Meanwhile, guanine oxidation  
241 can also occur before incorporation of the guanine nucleotide into DNA [38, 42, 44]. During  
242 replication, 8-oxodGTP would be incorporated at the position of thymidine, pairing with  
243 adenosine. In the next round of replication, the 8-oxoG would be paired with cytidine if it  
244 happens to switch into the *anti* conformation. The resulted change is a T to G mutation. This  
245 type of mutation has been clearly revealed by mutant *E. coli* strain lacking the MutT enzyme  
246 [42], which is responsible for repairing oxidatively damaged dGTP. The two mutational

247 forces, after being decreased in some proportions by the repairing systems, might cancel each  
248 other out in their effects on the evolution of GC content. In both the 70 aerobic prokaryotes  
249 and the 70 anaerobic prokaryotes analyzed in Fig. 2, the G to T transversion rates were a little  
250 higher than the T to G transversion rates. However, the differences were not statistically  
251 significant (Two-tailed Wilcoxon signed ranks test,  $P > 0.90$  for both comparisons, Table 2).  
252 Surprisingly, the C to A transversion rates were not higher, but significantly lower than the A  
253 to C transversion rates in both aerobes and anaerobes (Two-tailed Wilcoxon signed ranks test,  
254  $P < 0.05$  for both comparisons, Table 2). This result does not support the generally expected  
255 higher frequency of G:C to T:A mutations resulting from the oxidative DNA damage  
256 associated with aerobiosis. Therefore, the G:C to T:A transversions should not be regarded as  
257 the signature of oxidative stress in prokaryotic evolution. We also compared other symmetric  
258 directions of mutations. No significant differences were observed between the rates of T to C  
259 and C to T or between A to G and G to A in aerobic prokaryotes (Two-tailed Wilcoxon signed  
260 ranks test,  $P > 0.05$  for both comparisons, Table 2). However, different rates have been  
261 observed between all other pairs of symmetric mutational directions, A vs. T and C vs. G in  
262 the 70 aerobic prokaryotes and A vs. T, A vs. G, T vs. C, and C vs. G the 70 anaerobic  
263 prokaryotes (Two-tailed Wilcoxon signed ranks test,  $P < 0.05$  for all comparisons, Table 2).  
264 Although these differences are unlikely associated with guanine oxidation or oxidative stress,  
265 they showed that there are some kinds of significant differences in our dataset and so  
266 indirectly support the validity of the observed insignificant differences.

267 Although unexpectedly, these results are only new in prokaryotes. Similar results have  
268 been observed in recent spectrum analyses of somatic point mutations in mitochondrial DNA  
269 of aging tissues. A significant higher frequency of G to T mutations had not been detected in  
270 the mitochondrial genomes of aging animal tissues, being inconsistent with the contribution  
271 of oxidative stress to mitochondria-related aging [4, 45-47].

272

## 273 **Conclusions**

274 Our phylogenetic independent comparison did not detect significant difference in GC content  
275 between aerobic prokaryotes and anaerobic prokaryotes. The result is different from  
276 nonphylogenetically controlled comparisons which always give a pattern of higher GC  
277 content in aerobes than anaerobes [10, 18-26]. Meanwhile, we did not detect significant  
278 difference in GC content even after elaborate controlling of other GC-content influencing  
279 factors. Our further analyses of the nucleotide substitution rates at 4FDS of orthologous genes  
280 showed that the mutations generally be attributed to guanine oxidation are not different in  
281 their frequency between aerobic prokaryotes and anaerobic prokaryotes. Moreover, guanine  
282 oxidation might exert two mutational forces simultaneously on the evolution of GC content  
283 evolution, both G to T mutations and T to G mutations. Different from the general expectation,  
284 our results indicated that aerobiosis is not associated the evolution of GC content in  
285 prokaryotes. Meanwhile, we suggested that the G:C to T:A transversions are not the  
286 appropriate signature of oxidative DNA damage in studies of prokaryotic evolution.

287

## 288 **Methods**

289 In the Genomes Online Database (GOLD) [48], organisms are divided into ten categories  
290 according to their oxygen requirements: undefined, aerobe, anaerobe, facultative, facultative  
291 aerobe, facultative anaerobe, microaerophilic, microanaerobe, obligate aerobe, and obligate  
292 anaerobe. To avoid controversy, we retrieved only four categories: aerobe, anaerobe, obligate  
293 aerobe, and obligate anaerobe (access date: September 9, 2017). In the present study, the  
294 aerobes and obligate aerobes were merged into one group termed aerobes, and the anaerobes  
295 and obligate anaerobes were merged into another group termed anaerobes. In total, we  
296 obtained 4,009 aerobic prokaryotic samples and 2,707 anaerobic prokaryotic samples. The

297 GC contents of 2,137 aerobic samples and 1,744 anaerobic samples were obtained from the  
298 summary section of the homepage of each species or strain in the NCBI Genome database. In  
299 the nonphylogenetically controlled comparison, we used the average value to represent the  
300 GC content of species that had multiple strains consistent in oxygen requirements. In species  
301 of both aerobic and anaerobic strains, the GC content of each strain was considered an  
302 independent sample. The genome sequences of the paired species or strains were retrieved  
303 from the NCBI Genome database (<ftp://ftp.ncbi.nlm.nih.gov/genomes/>). The GC content used  
304 in the pairwise comparison was calculated from the downloaded genome sequences rather  
305 than retrieved directly from the NCBI Genome database. Although the GC content values  
306 from these two sources were not identical, they were highly similar. The regression equation  
307 was  $y = 0.9927x + 0.0026$ , and the  $R^2$  value was 0.9909.

308 In the phylogenetically controlled comparison, we compared each aerobic prokaryote  
309 with its closest anaerobic relative. Therefore, we selected all the species that included both  
310 aerobic strains and anaerobic strains. Then, from the remaining species, we selected all the  
311 genera that included both aerobic species and anaerobic species. Finally, we selected the  
312 families that included both aerobic genera and anaerobic genera. Aerobic and anaerobic  
313 prokaryotes distributed in different families or higher taxonomic ranks were not included in  
314 our pairwise comparison. Referring to the All-Species Living Tree [49], we roughly filtered  
315 out the species that were unlikely to be usable for pairwise comparison of closely related  
316 aerobes and anaerobes. For example, in Fig. 1, species 1, 2, 3 and 9 were discarded during the  
317 rough filtration of the samples. For the remaining samples, we constructed a  
318 neighbour-joining tree using the p-distance model integrated in the software MEGA7 with  
319 16S rRNA [50]. The p-distance (pairwise nucleotide distance) is the proportion of sites at  
320 which nucleotide sequences differ divided by the total number of nucleotides compared. The  
321 bootstrap values were obtained with 1,000 replications. For the poorly solved branches, we

322 separately constructed their phylogenetic tree in the same way using 16S rRNA. In the four  
323 cases in which the phylogenetic relationships could not be resolved using 16S rRNA  
324 sequences, we constructed their phylogenetic trees using the *dnaj* gene sequence, which is  
325 another widely used phylogenetic marker [51-53]. Each difference in oxygen requirement  
326 between one pair of adjacent lineages was considered an event of evolutionary change in  
327 oxygen requirement (Fig. 1). The representative aerobic and anaerobic strains or species  
328 within each group were selected according to their branch lengths in the phylogenetic tree.

329 For a comparative analysis of the GC content at 4FDS in orthologous genes, we retained  
330 only the genomes whose protein-coding sequences had been annotated. In total, our dataset  
331 included 70 aerobe-anaerobe pairs.

332 For genomes in which the 16S rRNA gene annotations were not available, we identified  
333 the 16S rRNA genes by searching the genomes for the corresponding Rfam 13.0 profiles  
334 using Infernal (version 1.1.2) [54, 55].

335 We noticed that many bacterial genomes have not been fully assembled and some 16S  
336 rRNA sequences are fragmental. In the alignment of these 16S rRNA fragments, there are  
337 often large gaps not because of insertion/deletion occurred in evolution, but because of the  
338 incompleteness of the sequences. Both gaps and mismatches in the alignment are counted in  
339 the calculation of similarity, but only mismatches are counted in the calculation of identity.  
340 Identity is thus more solid than similarity in the comparison of fragmental 16S rRNA  
341 sequences. Therefore, we used the identity of 16S rRNA sequences to represent the  
342 divergence time between each pair of lineages. The sequences were aligned using ClustalW  
343 with its default parameters [56].

344 Orthologous genes between the paired lineages were first predicted by the reciprocal best  
345 blast hits and then screened using the program Ortholuge (version 0.8) using its default  
346 parameters [57, 58]. The thresholds of ratios 1 and 2 were both set to 0.8. Ortholuge is an

347 ortholog-predicting method based on reciprocal best blast hits, and it improves the specificity  
348 of high-throughput orthologue predictions using an additional outgroup genome for reference.  
349 Ortholuge computes the phylogenetic distance ratios for each pair of orthologues that reflect  
350 the relative rate of divergence of the orthologues. Orthologues with a phylogenetic ratio that  
351 was significantly higher than that of the other orthologues in the genomes were considered  
352 incorrectly predicted and thus were discarded.

353 Properly aligned 4FDS of orthologous genes were obtained using the codon-preserved  
354 alignment software MACSE (version 1.2) with its default parameters [59]. Only the 4FDS  
355 that the nucleotide of one or both members of the aerobe-anaerobe pair were identical to that  
356 of outgroup were counted as the denominator in the calculation of the substitution rate. A  
357 substitution at a 4FDS was counted when the nucleotide of one member of the  
358 aerobe-anaerobe pair was different from that of outgroup while that of the other member was  
359 identical to that of outgroup.

360 Published sequences of MutY, MutM, MutT from the bacterium *Escherichia coli* str.  
361 K-12 substr. MG1655 (NCBI taxonomy ID: 511145) and the archaea *Azotobacter vinelandii*  
362 DJ (NCBI taxonomy ID: 322710) were used in bi-directional BLASTP [60]; database:  
363 non-redundant protein sequences; default parameters) to search the candidate homologous  
364 proteins in the respective pairs of bacteria and archaea, respectively.

365

### 366 **Additional files**

367 Additional file 1: Fig. S1 and Table S1. Comparisons using the dataset containing the quickly  
368 evolved aerobe-anaerobe pairs. Table S2. Presence and absence of genes coding enzymes  
369 responsible 8-oxoG repairing in the aerobic and anaerobic genome studied in figure 2.

370 (DOCX 251 kb)

371 Additional file 2: The data generated and analysed during this study. (ZIP 1585 kb)

372

### 373 **Abbreviations**

374 ROS: reactive oxygen species; 8-oxoG: 8-oxo-7,8-dihydro-guanosine; 4FDS: 4-fold

375 degenerate sites.

### 376 **Acknowledgements**

377 We appreciate the open communication with Dr. Hugo Naya and the helpful comments from

378 Adam Eyre-Walker.

### 379 **Funding**

380 This work was supported by the National Natural Science Foundation of China (31671321,

381 31421063, and 31371283).

### 382 **Availability of data and materials.**

383 The data generated and analysed during this study are included in the Additional files

384 (Additional file 2).

### 385 **Authors' contributions**

386 D.K.N. conceived the study and wrote the manuscript. S.A. retrieved the data from online

387 databases, matched the pairs, calculated the genomic GC content and the 16S rRNA identity,

388 and performed the statistical tests. X.R.L. identified the orthologous genes and the repairing

389 enzymes, calculated the GC content and nucleotide substitution rates at 4FDS. B.W.Z.

390 identified the 16S rRNA genes. ZLC verified some of the results. All authors read and

391 approved the final manuscript.

### 392 **Ethics approval and consent to participate**

393 Not applicable.

### 394 **Competing interests**

395 The authors declare that they have no competing interests.

396



## 397 **References**

- 398 1. Decker H, Van Holde KE. Oxygen and the Evolution of Life. Heidelberg: Springer; 2011.
- 399 2. Kanvah S, Joseph J, Schuster GB, Barnett RN, Cleveland CL, Landman U. Oxidation of  
400 DNA: damage to nucleobases. *Accounts Chem Res.* 2010;43:280-7.
- 401 3. Delaney S, Jarem DA, Volle CB, Yennie CJ. Chemical and biological consequences of  
402 oxidatively damaged guanine in DNA. *Free Radical Res.* 2012;46:420-41.
- 403 4. Kauppila JHK, Stewart JB. Mitochondrial DNA: Radically free of free-radical driven  
404 mutations. *Biochimica et Biophysica Acta (BBA) - Bioenergetics.* 2015;1847:1354-61.
- 405 5. Sheinman M, Hermsen R. Effects of DNA oxidation on the evolution of genomes. *bioRxiv.*  
406 2017.
- 407 6. Osborne AE, Sanchez JA, Wangh LJ, Ravigadevi S, Hayes KC. Oxidative damage is not a  
408 major contributor to AZT-induced mitochondrial mutations. *J AIDS Clin Res.* 2015;6:444.
- 409 7. De Bont R, van Larebeke N. Endogenous DNA damage in humans: a review of quantitative  
410 data. *Mutagenesis.* 2004;19:169-85.
- 411 8. Agashe D, Shankar N. The evolution of bacterial DNA base composition. *J Exp Zool Part*  
412 *B.* 2014;322:517-28.
- 413 9. Rocha EPC, Feil EJ. Mutational patterns cannot explain genome composition: Are there  
414 any neutral sites in the genomes of bacteria? *PLoS Genet.* 2010;6:e1001104.
- 415 10. Naya H, Romero H, Zavala A, Alvarez B, Musto H. Aerobiosis increases the genomic  
416 guanine plus cytosine content (GC%) in prokaryotes. *J Mol Evol.* 2002;55:260-4.

- 417 11. Martin AP. Metabolic-rate and directional nucleotide substitution in animal  
418 mitochondrial-DNA. *Mol Biol Evol.* 1995;12:1124-31.
- 419 12. Friedman KA, Heller A. On the non-uniform distribution of guanine in introns of human  
420 genes: Possible protection of exons against oxidation by proximal intron poly-G sequences. *J*  
421 *Phys Chem B.* 2001;105:11859-65.
- 422 13. Kanvah S, Schuster GB. The sacrificial role of easily oxidizable sites in the protection of  
423 DNA from damage. *Nucleic Acids Res.* 2005;33:5133-8.
- 424 14. Romero H, Pereira E, Naya H, Musto H. Oxygen and guanine–cytosine profiles in marine  
425 environments. *J Mol Evol.* 2009;69:203-6.
- 426 15. Mizuno CM, Ghai R, Saghai A, López-García P, Rodríguez-Valera F. Genomes of  
427 abundant and widespread viruses from the deep ocean. *mBio.* 2016;7:e00805-16.
- 428 16. Haro-Moreno JM, Lopez-Perez M, de la Torre J, Picazo A, Camacho A,  
429 Rodríguez-Valera F. Fine stratification of microbial communities through a metagenomic  
430 profile of the photic zone. *bioRxiv.* 2017:134635.
- 431 17. Mendez R, Fritsche M, Porto M, Bastolla U. Mutation bias favors protein folding stability  
432 in the evolution of small populations. *PLoS Comput Biol.* 2010;6:e1000767.
- 433 18. Mann S, Chen YPP. Bacterial genomic G plus C composition-eliciting environmental  
434 adaptation. *Genomics.* 2010;95:7-15.
- 435 19. Karpinets TV, Park BH, Uberbacher EC. Analyzing large biological datasets with  
436 association networks. *Nucleic Acids Res.* 2012;40:e131-e.

- 437 20. Goncarenco A, Ma B-G, Berezovsky IN. Molecular mechanisms of adaptation emerging  
438 from the physics and evolution of nucleic acids and proteins. *Nucleic Acids Res.*  
439 2014;42:2879-92.
- 440 21. Bohlin J, Snipen L, Hardy SP, Kristoffersen AB, Lagesen K, Dønsvik T et al. Analysis of  
441 intra-genomic GC content homogeneity within prokaryotes. *BMC Genomics.* 2010;11:464.
- 442 22. Ogier J-C, Lafarge V, Girard V, Rault A, Maladen V, Gruss A et al. Molecular  
443 fingerprinting of dairy microbial ecosystems by use of temporal temperature and denaturing  
444 gradient gel electrophoresis. *Appl Environ Microbiol.* 2004;70:5628-43.
- 445 23. Pavlović-Lažetić GM, Mitić NS, Kovačević JJ, Obradović Z, Malkov SN, Beljanski MV.  
446 Bioinformatics analysis of disordered proteins in prokaryotes. *BMC Bioinformatics.*  
447 2011;12:66.
- 448 24. Meiler A, Klinger C, Kaufmann M. ANCAC: amino acid, nucleotide, and codon analysis  
449 of COGs – a tool for sequence bias analysis in microbial orthologs. *BMC Bioinformatics.*  
450 2012;13:223.
- 451 25. Malik AA, Thomson BC, Whiteley AS, Bailey M, Griffiths RI. Bacterial physiological  
452 adaptations to contrasting edaphic conditions identified using landscape scale metagenomics.  
453 *mBio.* 2017;8:e00799-17.
- 454 26. Fuchsman CA, Collins RE, Rocap G, Brazelton WJ. Effect of the environment on  
455 horizontal gene transfer between bacteria and archaea. *PeerJ.* 2017;5:e3865.
- 456 27. Felsenstein J. Phylogenies and the comparative method. *Am Nat.* 1985;125:1-15.

- 457 28. Vieira-Silva S, Rocha EPC. An assessment of the impacts of molecular oxygen on the  
458 evolution of proteomes. *Mol Biol Evol.* 2008;25:1931-42.
- 459 29. Bohlin J, Brynildsrud O, Vesth T, Skjerve E, Ussery DW. Amino acid usage is  
460 asymmetrically biased in AT- and GC-rich microbial genomes. *PLoS ONE.* 2013;8:e69878.
- 461 30. Lassalle F, Perian S, Bataillon T, Nesme X, Duret L, Daubin V. GC-content evolution in  
462 bacterial genomes: the biased gene conversion hypothesis expands. *PLoS Genet.*  
463 2015;11:e1004941.
- 464 31. Pessia E, Popa A, Mousset S, Rezvoy C, Duret L, Marais GAB. Evidence for widespread  
465 GC-biased gene conversion in eukaryotes. *Genome Biol Evol.* 2012;4:787-94.
- 466 32. Hurst LD, Merchant AR. High guanine-cytosine content is not an adaptation to high  
467 temperature: a comparative analysis amongst prokaryotes. *Proc R Soc B.* 2001;268:493-7.
- 468 33. Musto H, Naya H, Zavala A, Romero H, Alvarez-Valin F, Bernardi G. Correlations  
469 between genomic GC levels and optimal growth temperatures in prokaryotes. *FEBS Lett.*  
470 2004;573:73-7.
- 471 34. Musto H, Naya H, Zavala A, Romero H, Alvarez-Valin F, Bernardi G. Genomic GC level,  
472 optimal growth temperature, and genome size in prokaryotes. *Biochem Biophys Res Commun.*  
473 2006;347:1-3.
- 474 35. Basak S, Mandal S, Ghosh TC. Correlations between genomic GC levels and optimal  
475 growth temperatures: some comments. *Biochem Biophys Res Commun.* 2005;327:969-70.
- 476 36. Marashi S-A, Ghalanbor Z. Correlations between genomic GC levels and optimal growth  
477 temperatures are not 'robust'. *Biochem Biophys Res Commun.* 2004;325:381-3.

- 478 37. Wang H-C, Susko E, Roger AJ. On the correlation between genomic G+C content and  
479 optimal growth temperature in prokaryotes: Data quality and confounding factors. *Biochem*  
480 *Biophys Res Commun.* 2006;342:681-4.
- 481 38. Cheng KC, Cahill DS, Kasai H, Nishimura S, Loeb LA. 8-hydroxyguanine, an abundant  
482 form of oxidative DNA damage, causes G → T and A → C substitutions. *J Biol Chem.*  
483 1992;267:166-72.
- 484 39. Slesak I, Slesak H, Zimak-Piekarczyk P, Rozpadek P. Enzymatic antioxidant systems in  
485 early anaerobes: Theoretical considerations. *Astrobiology.* 2016;16:348-58.
- 486 40. Brioukhanov AL, Netrusov AI. Aerotolerance of strictly anaerobic microorganisms and  
487 factors of defense against oxidative stress: A review. *Appl Biochem Microbiol.*  
488 2007;43:567-82.
- 489 41. Jenney FE, Verhagen MFJM, Cui XY, Adams MWW. Anaerobic microbes: Oxygen  
490 detoxification without superoxide dismutase. *Science.* 1999;286:306-9.
- 491 42. Foster PL, Lee H, Popodi E, Townes JP, Tang HX. Determinants of spontaneous mutation  
492 in the bacterium *Escherichia coli* as revealed by whole-genome sequencing. *Proc Natl Acad*  
493 *Sci USA.* 2015;112:E5990-E9.
- 494 43. Lynch M, Ackerman MS, Gout J-F, Long H, Sung W, Thomas WK et al. Genetic drift,  
495 selection and the evolution of the mutation rate. *Nat Rev Genet.* 2016;17:704-14.
- 496 44. Schroeder JW, Yeesein P, Simmons LA, Wang JD. Sources of spontaneous mutagenesis in  
497 bacteria. *Crit Rev Biochem Mol Biol.* 2018;53:29-48.

- 498 45. Zsurka G, Peeva V, Kotlyar A, Kunz WS. Is there still any role for oxidative stress in  
499 mitochondrial DNA-dependent aging? *Genes*. 2018;9:175.
- 500 46. Itsara LS, Kennedy SR, Fox EJ, Yu S, Hewitt JJ, Sanchez-Contreras M et al. Oxidative  
501 stress is not a major contributor to somatic mitochondrial DNA mutations. *PLoS Genet*.  
502 2014;10:e1003974.
- 503 47. Kennedy SR, Salk JJ, Schmitt MW, Loeb LA. Ultra-sensitive sequencing reveals an  
504 age-related increase in somatic mitochondrial mutations that are inconsistent with oxidative  
505 damage. *PLoS Genet*. 2013;9:e1003794.
- 506 48. Mukherjee S, Stamatis D, Bertsch J, Ovchinnikova G, Verezhenska O, Isbandi M et al.  
507 Genomes OnLine Database (GOLD) v.6: data updates and feature enhancements. *Nucleic  
508 Acids Res*. 2017;45:D446-D56.
- 509 49. Munoz R, Yarza P, Ludwig W, Euzéby J, Amann R, Schleifer K-H et al. Release  
510 LTPs104 of the All-Species Living Tree. *Syst Appl Microbiol*. 2011;34:169-70.
- 511 50. Kumar S, Stecher G, Tamura K. MEGA7: Molecular evolutionary genetics analysis  
512 version 7.0 for bigger datasets. *Mol Biol Evol*. 2016;33:1870-4.
- 513 51. Yamada-Noda M, Ohkusu K, Hata H, Shah MM, Nhung PH, Sun XS et al.  
514 *Mycobacterium* species identification - A new approach via *dnaJ* gene sequencing. *Syst Appl  
515 Microbiol*. 2007;30:453-62.
- 516 52. Alexandre A, Laranjo M, Young JPW, Oliveira S. *dnaJ* is a useful phylogenetic marker  
517 for alphaproteobacteria. *Int J Syst Evol Microbiol*. 2008;58:2839-49.

- 518 53. Huang CH, Chang MT, Huang LN, Chu WS. The *dnaJ* gene as a molecular discriminator  
519 to differentiate among species and strain within the *Lactobacillus casei* group. Mol Cell  
520 Probes. 2015;29:479-84.
- 521 54. Nawrocki EP, Eddy SR. Infernal 1.1: 100-fold faster RNA homology searches.  
522 Bioinformatics. 2013;29:2933-5.
- 523 55. Nawrocki EP, Burge SW, Bateman A, Daub J, Eberhardt RY, Eddy SR et al. Rfam 12.0:  
524 updates to the RNA families database. Nucleic Acids Res. 2015;43:D130-D7.
- 525 56. Thompson J, Higgins D, Gibson T. CLUSTAL W: improving the sensitivity of  
526 progressive multiple sequence alignment through sequence weighting, position-specific gap  
527 penalties and weight matrix choice. Nucleic Acids Res. 1994;22:4673-80.
- 528 57. Whiteside MD, Winsor GL, Laird MR, Brinkman FSL. OrtholugeDB: a bacterial and  
529 archaeal orthology resource for improved comparative genomic analysis. Nucleic Acids Res.  
530 2013;41:D366-D76.
- 531 58. Fulton DL, Li YY, Laird MR, Horsman BG, Roche FM, Brinkman FS. Improving the  
532 specificity of high-throughput ortholog prediction. BMC Bioinformatics. 2006;7:270.
- 533 59. Ranwez V, Harispe S, Delsuc F, Douzery EJP. MACSE: Multiple Alignment of Coding  
534 SEquences accounting for frameshifts and stop codons. PLoS ONE. 2011;6:e22594.
- 535 60. BLAST: Basic local alignment search tool. <https://blast.ncbi.nlm.nih.gov/Blast.cgi>.  
536  
537  
538

539

540

541 Table 1. Relationship between GC content and aerobiosis is not dependent on divergence

542 between compared lineages.

| 16S rRNA<br>identity | Number of<br>pairs | <i>P</i> values of two-tailed Wilcoxon signed-rank tests |                      |                              |
|----------------------|--------------------|----------------------------------------------------------|----------------------|------------------------------|
|                      |                    | Whole<br>genomes                                         | 4FDS of all<br>genes | 4FDS of orthologous<br>genes |
| No limits            | 70                 | 0.826                                                    | 0.951                | 0.886                        |
| >0.860               | 56                 | 0.763                                                    | 0.967                | 0.896                        |
| >0.913               | 42                 | 0.945                                                    | 0.769                | 0.740                        |
| >0.955               | 28                 | 0.600                                                    | 0.909                | 0.891                        |
| >0.980               | 14                 | 0.683                                                    | 0.551                | 0.551                        |

543 The divergence between each pair of aerobe-anaerobe lineages was represented by the

544 identity of their 16S rRNA molecules. 4FDS: 4-fold degenerate sites.

545

546

547

548

549

550

551



552

553 Table 2. Comparison of the rates between symmetrical mutations in both aerobes and

554 anaerobes.

|        | Aerobic prokaryotes |          | Anaerobic prokaryotes |          |
|--------|---------------------|----------|-----------------------|----------|
|        | Average $\pm$ SD    | <i>P</i> | Average $\pm$ SD      | <i>P</i> |
| G to T | 0.093 $\pm$ 0.085   | 0.917    | 0.094 $\pm$ 0.091     | 0.893    |
| T to G | 0.088 $\pm$ 0.069   |          | 0.087 $\pm$ 0.072     |          |
| C to A | 0.071 $\pm$ 0.073   | 0.001    | 0.063 $\pm$ 0.062     | < 0.001  |
| A to C | 0.146 $\pm$ 0.158   |          | 0.134 $\pm$ 0.119     |          |
| G to A | 0.085 $\pm$ 0.074   | 0.055    | 0.080 $\pm$ 0.074     | 0.009    |
| A to G | 0.122 $\pm$ 0.093   |          | 0.124 $\pm$ 0.088     |          |
| G to C | 0.131 $\pm$ 0.087   | < 0.001  | 0.129 $\pm$ 0.089     | < 0.001  |
| C to G | 0.096 $\pm$ 0.063   |          | 0.098 $\pm$ 0.062     |          |
| C to T | 0.129 $\pm$ 0.103   | 0.152    | 0.123 $\pm$ 0.109     | 0.025    |
| T to C | 0.170 $\pm$ 0.134   |          | 0.174 $\pm$ 0.125     |          |
| A to T | 0.095 $\pm$ 0.083   | < 0.001  | 0.094 $\pm$ 0.077     | < 0.001  |
| T to A | 0.061 $\pm$ 0.057   |          | 0.065 $\pm$ 0.066     |          |

555 All significance values were calculated using two-tailed Wilcoxon signed-rank tests. SD:

556 standard deviation.

557

558

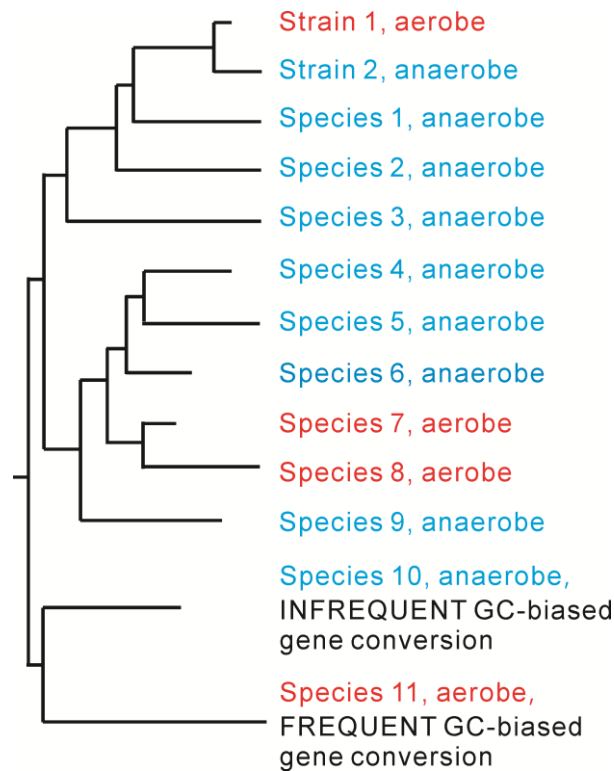

559

560 Fig. 1. Illustration of the difference between nonphylogenetically-controlled comparisons and

561 phylogenetically-controlled comparison performed in this study. In a nonphylogenetically

562 controlled comparison, the aerobes (including strain 1, species 7, species 8, and species 11)

563 are compared to all the anaerobes (including strain 2, species 1-6, and species 9-10). However,

564 only three changes in oxygen requirement are observed in the illustrated evolutionary tree.

565 The differences in GC content between these three branches are likely to be associated with

566 changes in the oxygen requirement. Therefore, only three pairs should be included in a

567 phylogenetically controlled comparison. For branches having multiple strains/species with

568 different evolutionary rates (*e.g.*, species 4-8), we paired the slowly evolved aerobic

569 strain/species with the slowly evolved anaerobic strain/species (species 6 *vs* species 7). In

570 cases with two or more strains/species with identical divergence times, we preferentially

571 selected the genomes in which more genes had been annotated. Next, the comparisons were

572 duplicated using the dataset including the quickly evolved pairs (*e.g.*, species 5 *vs* species 8

573 selected from species 4-8). Nearly identical results were obtained in the duplicated

574 comparison. The results of the former are presented in Fig. 2 and Table 1, and those of the

575 latter are deposited as electronic supplementary material (Additional file 1: Fig. S1 and Table  
576 S1). The choice of an anaerobe from species 4, 5 or 6 or an aerobe from species 7 or 8 did not  
577 alter the results. The results of a pairwise comparison of the tips do not appear to be sensitive  
578 to the inaccuracies in the topology of the phylogeny.  
579  
580  
581

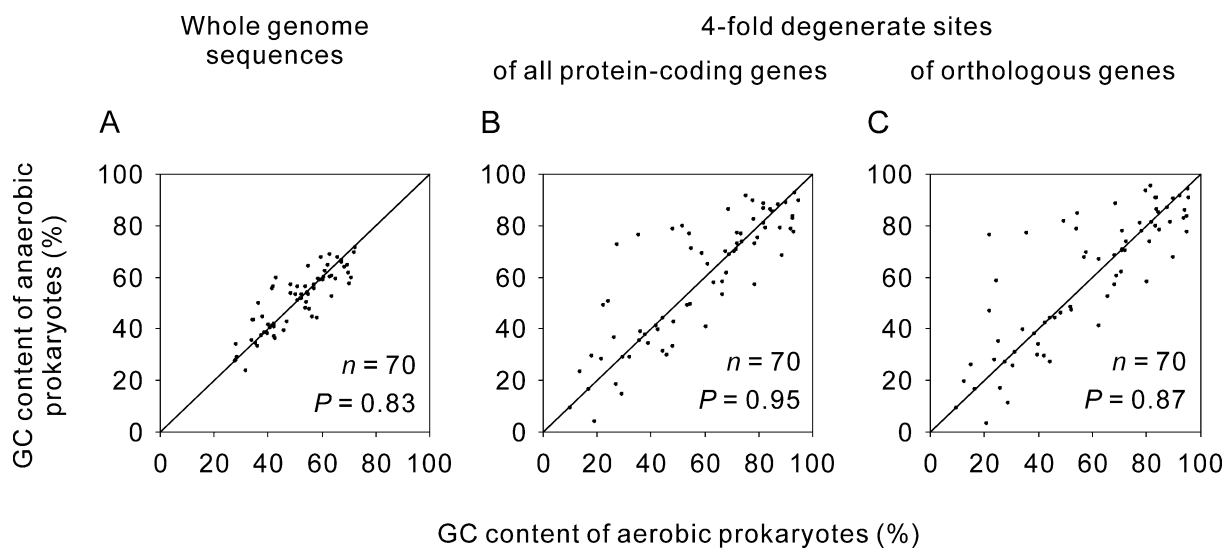

582  
583  
584  
585 Fig. 2. Pairwise comparison of GC content between aerobic and anaerobic prokaryotes. (A)  
586 Comparison of the GC content calculated from whole-genome sequences. (B) Comparison of  
587 GC content at the 4FDS of all protein-coding genes in each genome. (C) Comparison of GC  
588 content at the 4FDS of orthologous genes. The diagonal line represents cases in which  
589 aerobes and their paired anaerobes have the same GC content. Points above the line represent  
590 cases in which anaerobes have higher GC content than their paired aerobes, while points  
591 below the line indicate the reverse. All significance values were calculated using two-tailed  
592 Wilcoxon signed-rank tests.
